# Supplementary material for: A Deep Sequencing Strategy for Investigation of Virus Variants within African Swine Fever Virus-Infected Pigs
Source: MDPI journal article supplement (doi:10.3390/pathogens13020154), 2024-02-08
Supplement: s1 [file s1]

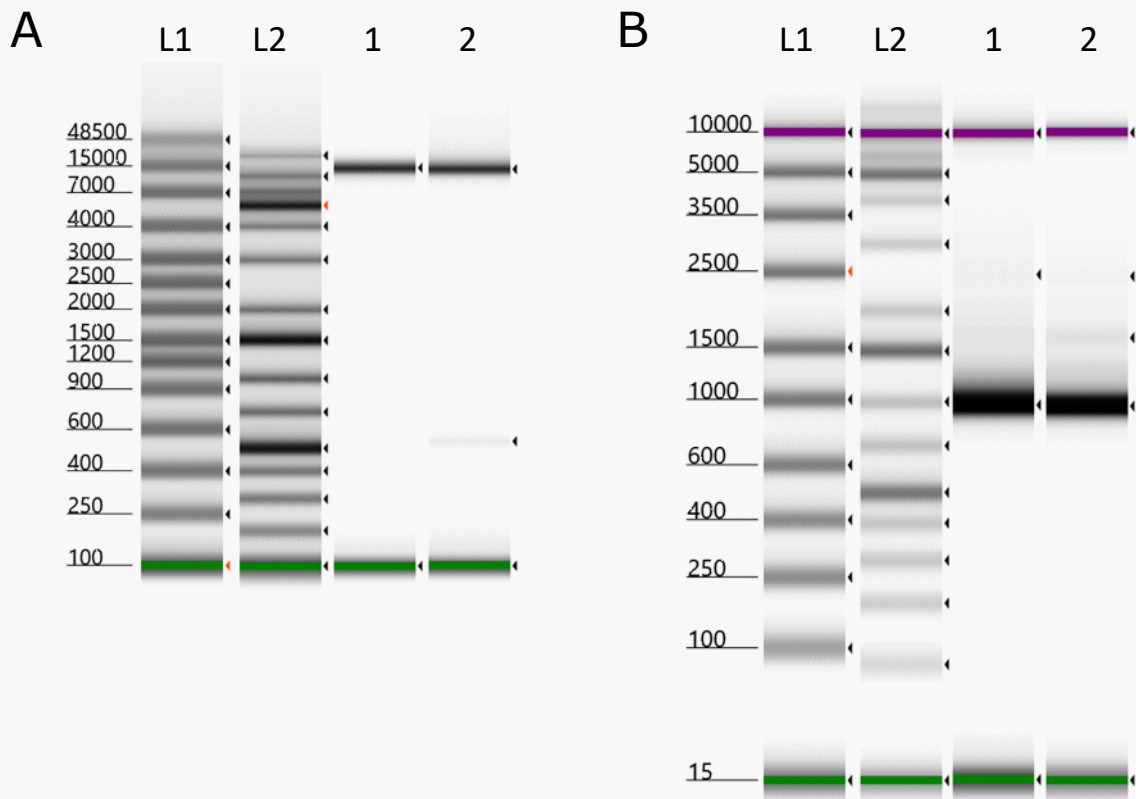

**Figure S1.** Deletion screening. A) PCRs with primers covering nt 6188-17145. L1: Genomic Ladder. L2: GeneRuler 1kb plus. 1: First passage. 2: Inoculum. B) PCR with primers covering nt 6708-7668. L1: D5000 Ladder. L2: GeneRuler 1kb plus. 1: First passage. 2: Inoculum.
